1

2

3 **Endoderm Morphogenesis Reveals Integration of Distinct**  
4 **Processes in the Development and Evolution of Pharyngeal**  
5 **Arches**

6

7 Kazunori Okada<sup>1\*</sup>, Hiroshi Wada,<sup>2</sup> and Shinji Takada<sup>1,3\*</sup>

8

9 <sup>1</sup>*Okazaki Institute for Integrative Bioscience and National Institute for Basic Biology,*  
10 *National Institutes of Natural Sciences, 5-1 Higashiyama, Myodaiji-cho, Okazaki*  
11 *444-8787, Japan*

12 <sup>2</sup>*Graduate School of Life and Environmental Sciences, University of Tsukuba, 111*  
13 *Tennoudai, Tsukuba 305-8572, Japan*

14 <sup>3</sup>*Department for Basic Biology, SOKENDAI (The Graduate University for Advanced*  
15 *Studies), 5-1 Higashiyama, Myodaiji-cho, Okazaki 444-8787, Japan*

16

17 \*Corresponding Authors: K.O., [tobiuo126@gmail.com](mailto:tobiuo126@gmail.com); S.T., [stakada@nibb.ac.jp](mailto:stakada@nibb.ac.jp)

18 **ABSTRACT**

19 The vertebrate pharyngeal arches (PAs) are established by a combination of two styles  
20 of segmentation; the most anterior 2 PAs are simultaneously but the others are  
21 sequentially formed. However, the mechanism underlying their coexistence is unclear.  
22 Here, we show that the simultaneous and sequential segmentation discretely proceeded,  
23 respectively, but were finally integrated at the second PP (PP2), by dynamic  
24 morphogenesis of pharyngeal endoderm in the zebrafish. The coordination of these 2  
25 distinct processes appears to be common in the PA development of many vertebrates, in  
26 which specific developmental defects posterior to the PP2 are caused by mutations of  
27 particular genes or perturbation of retinoic acid signaling. Surprisingly, comparative  
28 analysis of PA segmentation showed that the combinatorial styles of PA development is  
29 present in shark but not in lamprey, suggesting that PA segmentation was modified in  
30 the stem gnathostomes corresponding to the drastic pharyngeal innovations, such as  
31 PA2-derived opercular.

## 32 INTRODUCTION

33           The elaborated morphologies of organisms are often traced back to the simple  
34 metameretic motifs, which are transiently established during development. Through the  
35 segmentation of these metameretic motifs, the equivalent units, consisting of a certain  
36 group of cells, are formed and arranged along the body axis [1]. Each of these units  
37 becomes subsequently specialized to develop particular characteristics, based on their  
38 positional values, which are defined by collinear expression of Hox genes [2]. During  
39 vertebrate development, conspicuous segmental structures called pharyngeal arches  
40 (PAs) are bilaterally arranged in the ventral region of the head [3, 4]. PAs give rise to  
41 the segmental organization of skeletons, muscles, nerves, and vessels in the pharynx;  
42 and, therefore, segmentation and subsequent specification of the PA are crucial for the  
43 development of the vertebrate head [5].

44           In addition to all 3 germ layers, PA development involves cranial neural crest  
45 cells (CNCCs) [3-5]. Importantly, CNCCs have been considered to be dominant in the  
46 differentiation of PA-specific characteristics [6, 7]. The tripartite streams of CNCCs,  
47 referred to as the trigeminal, hyoid, and branchial streams, specify the regions of the  
48 jaw-forming first PA (PA1) or mandibular arch (MA); the hyoid-forming PA2, called  
49 the hyoid arch (HA); and the more posterior PAs, referred to as the branchial arches  
50 (BAs), respectively [8-11], depending on branchial Hox codes specified in the CNCCs  
51 [12]. On the other hand, the segmentation of the PA units occurs independently of these  
52 CNCCs [13, 14]. Rather, the pharyngeal endoderm plays a pivotal role in this  
53 segmentation by generating epithelial outpocketings called pharyngeal pouches (PPs),

54 which physically define the anterior and posterior interfaces of each PA [4, 5].

55           Interestingly, the anterior most 2 PAs (MA and HA) are formed  
56 simultaneously; whereas the posterior PAs (BAs) are generated sequentially in an  
57 anterior to posterior order [13, 15, 16], suggesting discrete regulation of the anterior and  
58 posterior PA segmentation. Correspondingly, retinoic-acid (RA) deficiency in zebrafish  
59 [17], quail [18], rat [19] and mouse [20] embryos consistently results in abnormalities in  
60 the segmentation of their PAs posterior to the second PP (PP2). Similarly,  
61 *pax1*-knockout in medaka [21] and *Ripply3*-knockout in the mouse [22] show the loss  
62 of the posterior PAs but a normal MA and HA. These studies suggest that distinct  
63 segmentation mechanisms for the anterior and posterior PAs may operate to establish  
64 the entire series of PAs. However, the development of this complex style of PA  
65 segmentation has been poorly understood. In particular, the question as to how the two  
66 distinct mechanisms are integrated at the formation of the PP2 should be answered.

67           This unique segmentation of PAs probably was established during the course  
68 of vertebrate evolution. The vertebrate PPs are homologous to the endodermal gill slits  
69 in the pharynx of non-vertebrate deuterostomes, such as hemichordate and amphioxus  
70 [4, 23-26]. In contrast to the segmentation of vertebrate PPs, all of these gill slits are  
71 simply formed in a sequential manner [24, 27]. Since similar sequential segmentation  
72 occurs only in the BA region of vertebrates, the endodermal segmentation had probably  
73 been modified in the evolution of the vertebrate lineage. In addition to the evolution of  
74 the segmentation style, innovative roles of the endoderm in pharyngeal development  
75 should also have arisen in accordance with the acquisition of neural crest cells by the

76 common ancestor of vertebrates. Previous studies have shown that not only the intrinsic  
77 machinery in CNCCs but also signals from the PP endoderm to the CNCCs are crucial  
78 for the development of the cranial skeletons [16, 28-30]. Therefore, it is plausible to  
79 propose that the pharyngeal endoderm experienced some developmental modifications  
80 that enabled it to regulate the development of the CNCC-derived skeletons during  
81 vertebrate evolution [4]. However, the evolutionary scenario of PP segmentation and its  
82 contribution to the innovations of the vertebrate pharyngeal apparatus remain to be  
83 elucidated, mainly owing to the lack of adequate understanding of the mechanism of PP  
84 development.

85           Recent studies on zebrafish PP development have revealed the dynamic  
86 cellular nature of the endoderm forming the PPs [31-34], showing the advantages of the  
87 zebrafish model to dissect the processes of PP development. In this study, we examined  
88 the development of the zebrafish pharyngeal endoderm, especially focusing on the  
89 formation of PP2. Precise examination by live-imaging and cell-tracing experiments  
90 performed in zebrafish showed that the morphogenesis of the anterior and posterior PAs  
91 were apparently distinct. Especially, we found that PP2 was formed in an unexpected  
92 manner; i.e., the rostral and caudal aspects of PP2 were initially formed separately, then  
93 subsequently accessed with each other by dynamic remodeling of endoderm epithelium,  
94 and finally became integrated. These results resolved the pending issue regarding the  
95 interface between the distinct mechanisms of PA development. Crucially, this style of  
96 PA development was never established in the lamprey, an extent jawless vertebrate;  
97 whereas it became shared among the gnathostomes (jawed vertebrates). Thus, our

- 98 findings also suggested that renovation of PA segmentation in the gnathostome lineage
- 99 likely contributed to the evolution of the vertebrate craniofacial skeletons.

## 100 RESULTS

### 101 Rostral and Caudal Aspects of PP2 Emerged Separately during the 102 Development of Zebrafish Pharyngeal Endoderm

103 To better understand the development of the PA endoderm, we performed  
104 time-lapse imaging of the endodermal cells in transgenic zebrafish *Tg(sox17:EGFP)*, in  
105 which EGFP expression was specifically driven in the endodermal cells by the *sox17*  
106 promoter [35]. PA1 and PA2 appeared simultaneously at 16 hours post fertilization  
107 (hpf; Figure 1A–1F, Movie S1), whereas PP outpocketings posterior to PP3 were  
108 sequentially generated in an anterior-to-posterior order after 16 hpf (Figure 1F–1J,  
109 Movie S2). Unexpectedly, we found that 2 endodermal bulges appeared simultaneously  
110 with the PP1 budding in the area where the PP2 would be generated (Figure 1C, Movie  
111 S1). Notably, these bulges were gradually remodeled and finally became integrated with  
112 each other to form the PP2 (Figure 1G–1N, Movie S2). This remodeling occurred not  
113 prior to but in parallel with the sequential generation of the posterior PPs, suggesting  
114 that the posterior development proceeded independent of that of the PP2 integration  
115 (Figure 1G–1N, Movie S2).

116 To understand the dynamism of the endodermal bulges, we performed a  
117 lineage-tracing experiment by means of endoderm-specific photoconversion. To this  
118 end, we created *Tg(sox17:Kaede)*, a transgenic line harboring *kaede* expression under  
119 the control of the *sox17* promoter. Photoconversion of cells in the rostral bulge at 20 hpf  
120 revealed that these cells contributed to the rostral aspect of PP2 at 48 hpf (Figure 2A–  
121 2E and Figure S1). The descendants of these cells extensively spread to form the inner

122 lining of the distal part of the HA, where an opercular flap would later expand (Figure  
123 2A–2E and Figure S1). On the contrary, descendants from the caudal bulge became  
124 distributed in the caudal aspect of PP2 at 48 hpf, especially to its proximal region  
125 (Figure 2F–2J and Figure S1). In addition, cells in the intermediate region between the  
126 rostral and caudal bulges contributed to the more distal and ventral regions of the caudal  
127 aspect and the dorsal edge of the PP2 (Figure 2K–2N and Figure S1). Based on the  
128 various patterns of cell traces (n = 29, Figure 2 and Figure S1), we obtained an  
129 overview of the endodermal cell fate in the future PP2 region at 20 hpf (Figure 2O).  
130 Thus, the PP2 was generated by the dynamic remodeling of endodermal cells between  
131 the rostral and the caudal bulges, which directly contributed to the respective rostral and  
132 caudal aspects of PP2.

133

### 134 **Rostral and Caudal Bulges of Future PP2 Endoderm Region Exhibited** 135 **Characteristics of the Pharyngeal Pouch**

136 Our time-lapse observations and cell-tracing experiments revealed that PP2  
137 arose from 2 independent endodermal domains, which then coalesced into a pouch  
138 structure by the dynamic remodeling of the endoderm. To understand the development  
139 of PP2 more precisely, we examined the expression of PP-specific genes in the future  
140 PP2 endoderm. Remarkably, expression of *nkx2.3*, which is observed in the zebrafish  
141 PPs [36], was specifically detectable in the rostral and caudal bulges at 20 hpf (Figure  
142 3A and Figure S2). Consistent with the PP2 maturation, these *nkx2.3*-positive bulges  
143 gradually converged to form PP2 (Figure S2). Thus, PP2 was separately established



144 prior to the epithelial remodeling at the rostral and caudal bulges. We also examined the  
145 expression of *pax1*, which is known to be expressed in the PPs of many vertebrates. In  
146 the zebrafish genome, there are 2 orthologs of *pax1*, *pax1a* and *pax1b*. As expected,  
147 *pax1b* was expressed in the rostral and caudal bulges, as well as in the other PPs (Figure  
148 S2). On the other hand, *pax1a* was expressed in the caudal, but not the rostral bulge,  
149 suggesting that the rostral bulge might exhibit some specific character different from  
150 that of the other PP endoderm (Figure 3E–3H). These expression patterns of the  
151 PP-specific genes support the idea that at least some characteristics of PP2 had already  
152 been provided in the bulges. Furthermore, the separate expression of *nkx2.3* in the 2  
153 distinct bulges support our results obtained by time-lapse observation and cell-tracing  
154 experiments, which showed that PP2 was formed not by simple bending of the future  
155 PP2 region but by complex remodeling of the 2 distinct endodermal bulges.

156 To further understand the development of the future PP2 endoderm, we  
157 examined the rostro- and caudal-specific molecular characteristics of the PPs. The  
158 expression of *tbx1*, which was specific to the rostral aspect of each PP (Figure S2), was  
159 strongly detected in the rostral bulge but not in the caudal bulge (Figure 3I–3L);  
160 whereas that of *fgf3*, specific to the caudal aspect of PPs (Figure S2), was detected in  
161 the caudal bulge but not in the rostral one (Figure 3I, 3j, 3M and 3N). Crucially, *tbx1*-  
162 and *fgf3*-positive domains were separately detected in the PP2 endoderm before its  
163 integration, indicating that the rostral and caudal bulges had already acquired distinct  
164 rostrocaudal characteristics prior to the epithelial remodeling to form PP2. We refer to  
165 these rostral and caudal bulges as R2 and C2, respectively, hereinafter (Figure 3O).

166

167 **R2 and C2 Independently Contributed to Skeletal Development in HA and**  
168 **BA**

169           Since the molecular characteristics of the rostral and caudal aspects of PP2  
170 were observed in the endodermal domains of R2 and C2, respectively, we next  
171 investigated whether the rostral and caudal identities had actually been determined in  
172 R2 and C2. To this end, we specifically ablated the EGFP-labeled endodermal cells in  
173 the R2 or C2 region of *Tg(sox17:EGFP)* embryos by infrared laser-mediated heating  
174 [37, 38].

175           Consistent with the results from the cell-lineage tracing, ablation of R2 cells  
176 at 20 hpf (Figure 4A and 4A') impaired the expansion of the rostral aspect of PP2 at 48  
177 hpf (n = 3/3, Figure 4B and 4C). In later stage, R2 ablation resulted in loss of  
178 HA-derived dermal bones of the branchiostegal ray (BR; n = 12/16) and the opercular  
179 (OP; n = 10/16), both of which compose the operculum (Figure 4D–4F). For operculum  
180 development, Shh is required to be expressed in the HA [39]. We found that *shha* was  
181 expressed in the endoderm corresponding to the R2-derived cells (Figure 4G and 4H)  
182 and that this expression was decreased (n = 5/12) or eliminated (n = 5/12) by R2  
183 ablation (Figure 4I), suggesting that the R2 region gave rise to a signaling center of Shh  
184 for operculum formation. In addition, this ablation occasionally caused a size reduction  
185 of other HA-derived skeletons, such as the hyomandibular (HM; n = 3/16) and  
186 ceratohyal (CH; n = 6/16). The ceratobranchial (CB) cartilages, however, which are  
187 derived from BAs, were completely normal (n = 16/16, Figure 4D).

188           In contrast, ablation of cells in the C2 region (Figure 4J and 4J') caused  
189 abnormalities in the proximo-caudal PP2 adjacent to BA1 (or PA3; n = 3/3, Figure 4K  
190 and 4L), resulting in specific loss of the first CB cartilage (CB1; n = 8/8, Figure 4M).  
191 On the other hand, ablation of the intermediate cells between R2 and C2 (Figure 4N and  
192 4N') did not cause any loss of the pharyngeal skeleton; although the position of CB1 on  
193 the ablation side shifted posteriorly and laterally (n = 4/6, Figure 4Q). Interestingly, this  
194 ablation caused a split of endoderm between HA and BA1 (n = 10/12, Fig. 4 O and P),  
195 which were almost normally formed, showing the necessary role of the intermediate  
196 endoderm for the integration of HA and BA1. On the other hand, we could exclude the  
197 possibility that the loss of skeletal elements was due to possible deficits of CNCCs  
198 caused by the infrared irradiation to the endodermal cells, because the PA mesenchymal  
199 cells and expression of *dlx2a*, which is a credible marker of CNCCs in PAs, were not  
200 obviously changed by the ablation of the adjacent endoderm (n = 6, Figure S3).  
201 Therefore, we concluded that the endodermal cells of R2, C2, and the intermediate  
202 region played distinct roles for the craniofacial development in zebrafish. Significantly,  
203 their distinct roles were assigned or determined in the endodermal domains prior to the  
204 remodeling for the morphological maturation of PP2.

205

206 **Distinct Molecular Machineries for Rostral and Caudal Development of**  
207 **PP2: Mechanistic Interface and Integration Process of PA Development**  
208 **Unveiled.**

209           Previous studies suggested that the development of the anterior and posterior

210 PAs appears to be distinct in the molecular mechanism [17-22]. These studies suggested  
211 that the mechanistic boundary between them exists in the formation of the PP2. Thus, to  
212 resolve the complex system of the PA development, understanding of the molecular  
213 mechanism of the PP2 development should be considered crucial. Since our findings  
214 enabled us to dissect the developmental process of the PP2, we next addressed the issue  
215 as to how the distinct molecular machineries could coordinately achieve PP2 and the  
216 series of the vertebrate PAs.

217         Since RA signaling is specifically required for the development of the  
218 posterior PPs [17-20], we supposed that the R2–C2 boundary would correspond to the  
219 anterior border of RA function. Visualization of RA activity by utilizing a transgenic  
220 fish *Tg(RARE:Venus)*, which harbors a Venus reporter driven by RA-responsive  
221 elements (RARE) [40], showed that Venus was expressed in the C2 cells at 20 hpf and  
222 further persisted in their descendants, as well as in the posterior pharyngeal endoderm  
223 (Figure 5A–5F). In contrast, Venus expression was never detected in the R2 and PP1  
224 endoderm throughout our examination (Figure 5A–5F). Furthermore, treatment with  
225 DEAB, which inhibits RA biosynthesis, impaired C2 formation and *fgf3* expression in  
226 the C2 (Figure 5K–5N), but not *tbx1* expression in the R2 (Figure 5G–5J). Thus, RA  
227 signaling was specifically activated in and required for the pharyngeal endoderm  
228 posterior to the R2, indicating that the anterior border of RA function actually  
229 corresponded to the R2–C2 border we had identified.

230         Our previous study also showed that *pax1* is specifically required for the  
231 development of posterior PPs in medaka [21]. Since zebrafish has 2 *pax1* homologs,

232 *pax1a* and *pax1b*, we generated double knockout mutants of these genes (*pax1* DKO)  
233 by performing CRISPR/Cas9-mediated mutagenesis (Figure S4). As expected, the *pax1*  
234 DKO embryos clearly showed abnormalities in the development of their pharyngeal  
235 pouches posterior to the C2, but not in the R2 (Figure 5O–5R). Consistently, the gill  
236 skeletons, but not opercular skeletons, were lost in the *pax1* DKO larvae (Figure S4).  
237 Although the anterior part of HM (aHM), in which PP1 is required for its development  
238 [29], was lost in the *pax1* DKO larvae (Figure S4), the PP1 was normally formed in the  
239 mutant embryos (Figure 5O–5R), suggesting another role of *pax1* genes for the aHM  
240 development in PP1 at a stage later than the PP1 formation.

241           In addition to RA and *pax1*, the membrane protein Alcam, which accumulates  
242 in the PP epithelium to stabilize the bilayered PP morphology [31], its accumulation  
243 was low in the PP1 and R2, but high in the C2 and more posterior PPs (Figure 6),  
244 suggesting that the R2–C2 border may also have separated the morphogenetic process  
245 of the endodermal epithelial cells. Taken together, we concluded that 2 distinct  
246 developmental processes proceeded in the pharyngeal endoderm either anterior or  
247 posterior to the R2–C2 border and that these processes were subsequently integrated to  
248 form the zebrafish PP2 (Figure 7Q). In other words, we clearly revealed that HA and  
249 BA1 were compartmentalized by distinct mechanisms and subsequently integrated by  
250 the dynamic endoderm of PP2. Since the emergence of R2, the caudal limit of HA, and  
251 C2, the anterior limit of BA1, are spatially separated in the zebrafish, we succeeded in  
252 dissecting each process, and in finding the obvious mechanistic interface of the PA  
253 development and the coordination process.

254

## 255 **PA Development Evolved in the Jawed-Vertebrate Lineage**

256           When pharyngeal segmentation in vertebrates is compared with that in  
257 amphioxus and hemichordates, a temporal difference is found in the second segment of  
258 the endoderm: PP2 is formed simultaneously with PP1 in vertebrates, whereas the  
259 second gill slit is formed after the formation of the first gill slit in amphioxus and  
260 hemichordates [24, 27]. In order to gain insight into the evolutionary process of the  
261 pharyngeal segmentation in vertebrates, we investigated PP development in the lamprey,  
262 which lacks jaws and operculum. In contrast to those of osteichthyans, the anterior PPs  
263 during lamprey development were sequentially formed in an anterior to posterior  
264 sequence, as were the posterior PPs and the gill slits (Figure 7A–7E and 7Q). In  
265 addition, DEAB treatment impaired the PA development posterior to the PA2, including  
266 loss of the rostral aspect of PP2, in lamprey embryos (n=19/19, Figure 7F–7I).  
267 Considering that the HA segmentation by the rostral PP2 is resistant to RA deficiency in  
268 zebrafish and amniotes, lampreys appear to lack a developmental mechanism to  
269 establish HA without RA, resulting in the loss of HA in the treated embryos (Figure 7F–  
270 7I). Thus, the anterior PA development, especially the development of the rostral aspect  
271 of the PP2, was different between osteichthyans and lamprey, correlating with the huge  
272 morphological difference seen in the anterior PA derivatives between gnathostomes and  
273 cyclostomes.

274           This unexpected difference in PA development between lamprey and  
275 osteichthyans led us to conceive an evolutionary hypothesis that the developmental

276 mechanism of PA was modified during the evolution of gnathostomes or, jawed  
277 vertebrates. To inquire whether osteichthyan-type development of the pharyngeal  
278 endoderm, in which the anterior 2 PPs are simultaneously formed, is conserved in  
279 gnathostomes, we next examined the PP development in a shark (*Scyliorhinus*  
280 *torazame*) of chondrichthyans, an extant sister group of osteichthyans [41]. The shark  
281 PP1 and PP2 simultaneously appeared as 2 pairs of broad lateral swellings in the  
282 *pax1*-positive endoderm, and these subsequently matured into the bi-layered PP  
283 morphology (Figure 7J–7M). Similar to those in osteichthyans, the more posterior PPs  
284 were sequentially formed in an anterior to posterior order (Figure 7N–7P). Although it  
285 remains elusive as to whether shark PP2 development is carried out by the same  
286 mechanism as in osteichthyans or not, the simultaneous emergence of PP1 and PP2 was  
287 clearly identical to that seen in the osteichthyans (Figure 7Q–7R).

## 288 **DISCUSSION**

### 289 **Dissection of Dynamic Endoderm in Zebrafish PP2 Development Revealed**

### 290 **Separate Development of Anterior and Posterior PAs and Their Integration**

291           Generally, segmentation in animal development is carried out in a  
292 simultaneous manner, as seen in the *Drosophila* germ-band formation [42], or in a  
293 sequential manner, as represented by vertebrate somitogenesis[43], Interestingly, PA  
294 segmentation has been considered to be peculiarly achieved by the combined use of  
295 these distinct styles, although the developmental basis of their integration process has  
296 been entirely unknown. Zebrafish PA development, where dynamic epithelial  
297 remodeling of the PP-forming endoderm has been shown to take place, is a good model  
298 to resolve the elusive issue of development of the vertebrate head [31-34]. In this  
299 present study, by using precise live imaging in zebrafish, we found the 2 endoderm  
300 bulges of R2 and C2 in the future PP2 endoderm and uncovered their dynamic  
301 integration process forming PP2. Our cell-tracing experiments in the endoderm clearly  
302 revealed the direct contributions of R2 and C2 to the rostral and the caudal aspects of  
303 PP2, respectively. Their rostrocaudal identities in the PP were separately determined at  
304 an early timing in the PP segmentation, as evidenced by the gene expression and  
305 cell-ablation experiments. Importantly, the intermediate endodermal cells between R2  
306 and C2 did not contribute to the formation of the PA-derived skeletons, although they  
307 were required for a tight arrangement of the anterior and posterior PAs. These results  
308 suggest that the anterior and posterior PAs were independently formed by distinct  
309 endodermal development (Figure 7Q). Subsequently, these distinct domains became



310 integrated to form the systematic PA-derived organs by the dynamic epithelial  
311 transformation causing maturation of PP2 in the HA–BA border (Figure 7R).

312           Based on our results, we can adequately propose a novel view for vertebrate  
313 PA development; that is, HA and BAs are independently established by distinct  
314 developmental mechanisms for R2 and C2 endoderm, respectively. Given our viewpoint,  
315 the posterior PA-specific defects and the PP2 insufficiency, which are commonly  
316 reported as being phenotypes of RA-deficient vertebrates [17-20], are explained more  
317 reasonably as defects brought about posterior to C2. Similarly, the *pax1* mutants of  
318 teleost fish [21] and the *Ripply3* mutant mouse [22] show the anterior limits of the PP  
319 defects in the C2 endoderm. We previously proposed that developmental system drift  
320 should have occurred in the posterior PA segmentation among fish and mouse [21].  
321 Notably, the anterior limit of the pharyngeal endoderm, where that drift has occurred, is  
322 also the C2 endoderm, strongly suggesting the conserved developmental interface  
323 between HA and BAs or the developmental independency of R2 from the posterior PAs  
324 in gnathostomes. Although *tbx1* is required not only for posterior PA development but  
325 also for HA development [44], our idea is not controversial because the expression of  
326 *tbx1* is independent from *pax1* function in HA endoderm; whereas that in BA endoderm  
327 is a *pax1*-dependent one [21]. This difference suggests that there are distinct gene  
328 regulatory networks between anterior and posterior PAs, rather highlighting the  
329 developmental independency of HA from BAs.

330           In addition to the separate establishment of HA and BA1, our study also  
331 revealed their integration process. Interestingly, the endodermal cells between R2 and

332 C2 contributed to a part of PP2; however, they were not necessary to develop the HA-  
333 and BA1-derived skeletal elements, suggesting that they functioned developmentally  
334 like a glue to bind 2 PAs. This integration process or the endodermal cells identical to  
335 the intermediate endoderm have not been found in other species. Thus, we also  
336 speculate that the PA development largely depends on the endodermal epithelial  
337 morphogenesis, which is divergent among vertebrates. Further investigation by  
338 live-imaging analysis and cell-tracing experiments for endodermal behaviors of other  
339 vertebrates, especially amniotes, is required to shed light on whether the integrative  
340 development of PAs by the dynamic endoderm is common in vertebrates or not.

341

## 342 **Evolution of Pharyngeal Segmentation Possibly Contributed to Drastic** 343 **Innovations of PA Derivatives**

344 Whereas the vertebrate oropharyngeal regions display a huge variety of  
345 adaptive morphologies, the vertebrate PAs are fundamentally conserved in their  
346 architecture, developmental overview, and gene expression patterns[4]. Even in  
347 amphioxus and hemichordates, which diverged before the emergence of the vertebrates,  
348 the endodermal segmentation and expression of pharyngeal genes are largely conserved  
349 as in the vertebrate PPs [4, 23-26]. In the light of this information, our finding of the  
350 differential regulation of PP development between gnathostome species and the lamprey  
351 is surprising. Not only the RA dependence but also the timing of lamprey PP  
352 development was different from those of gnathostomes (Figure 7Q). The sequential  
353 segmentation of all pharyngeal segments in the lamprey was rather similar to that of the

354 endodermal gill slits in the non-vertebrate deuterostomes. Additionally, the  
355 simultaneous segregation of the anterior PAs in shark embryos was identical to that in  
356 osteichthyans (Figure 7Q), indicating that the ancestral style of the PP development  
357 seen in the lamprey had been modified in the gnathostome lineage. Strikingly, this  
358 modification took place in the endoderm corresponding to R2, which we identified in  
359 the present study (Figure 7R).

360           What is the significance of the R2 acquisition for the morphological evolution  
361 of the vertebrate head? We suppose that the R2 acquisition probably contributed to the  
362 evolution of the opercular system, which is conserved in osteichthyans [39]. A recent  
363 study on a fossilized placoderm, *Entelognathus*, which has the opercular and  
364 branchiostegal rays, suggests that the osteichthyan-like pharyngeal system exists in the  
365 stem gnathostomes [45]. Furthermore, it has been also suggested that the  
366 chondrichthyan affinity of acanthodians, which possess a hyoidean gill cover with  
367 branchiostegal rays, implies unique evolution of the chondrichthyan pharyngeal system  
368 composed of septal gills [41, 46, 47]. Although the skeletal elements of the operculum  
369 have been lost during tetrapod evolution, the embryonic opercular flap, which is derived  
370 from the Shh-expressing HA, encloses the posterior pharyngeal region during amniote  
371 development [4, 39]. We identified the R2 endoderm, which directly contributed to the  
372 operculum, including the Shh-expressing cells in the zebrafish HA. Thus, we propose  
373 that the HA development distinct from that of the BAs should have been acquired in the  
374 stem gnathostomes, being the crucial basis for the novel pharyngeal system of the  
375 hyoidean operculum leading to the extent osteichthyans (Figure 8).

376           It is still unclear how the development of PP1 and the rostral layer of PP2 are  
377 regulated. The independency of the PP1 development from other PPs has been indicated  
378 by the results of previous studies on zebrafish [16, 29, 48] and mouse development [44,  
379 49]. We showed that the lamprey PP1 was formed independent of RA signaling.  
380 Additionally, in amphioxus, the formation of the first gill slit is less affected by *pax1/9*  
381 knockdown than that of the other gill slits, which exhibit severe defects [50]. These  
382 findings imply the evolutionally conserved independency of the first endodermal bulges  
383 from the others. Therefore, the development of the vertebrate PPs, especially in  
384 gnathostomes, can be possibly considered as involving tripartite sections, i.e. PP1, the  
385 rostral layer of PP2, and more posterior region (Figure 7R). Significantly, these  
386 endodermal sections correspond to the interfaces of 3 streams of the cranial NCCs  
387 composing the MA, HA, and BAs. Therefore, we propose the possibility that the  
388 modifications of the endodermal segmentation reinforced the topological restrictions of  
389 the NCC streams in the PAs. Further studies on the development of PPs may answer  
390 one of the biggest issues regarding development of the vertebrate head, that is, the logic  
391 for the coordination between pre-patterned NCCs and endodermal segmentation.

## 392 **METHODS**

### 393 **Zebrafish, shark, and lamprey embryos**

394 Zebrafish with the TL2 background were used as the wild type, as described previously  
395 [51]. Collected embryos were incubated at 28°C. Embryos that would be fixed later than  
396 25 hpf were treated with 0.003% 1-Phenyl-2-thiourea (PTU) from 10 hpf until fixation  
397 to inhibit melanin synthesis. Eggs of the cloudy cat shark (*Scyliorhinus torazame*),  
398 which were collected from the established breeding colony in the Hekinan Seaside  
399 Aquarium, were grown at 16°C; and their developmental stages were determined  
400 according to the morphological criteria of a related species (*S. canicula*) [52]. Embryos  
401 of lampreys (*Lethenteron camtschaticum*) were collected as described previously [53],  
402 and their developmental stages were determined as described earlier [54]. This study  
403 was performed in accordance with the Guidelines for Animal Experimentation of  
404 National Institutes of Natural Sciences, with approval of the Institutional Animal Care  
405 and Use Committee (IACAC) of the National Institutes of Natural Sciences.

406

### 407 **Transgenic zebrafish and mutagenesis**

408 *Tg(sox17:EGFP)* and *Tg(RARE:Venus)* were used in this study. For generation of  
409 *Tg(sox17:Kaede)*, the Kaede cDNA fragment from pKaede-S1 (MBL) and the same  
410 promoter sequence as used for the *Tg(sox17:EGFP)* were combined and cloned into the  
411 pSK-tol2B vector [55]. Transgenesis was performed by using the Tol2 system [56]. For  
412 CRISPR/Cas9-mediated knockout, target sequences were determined by using the  
413 ZiFiT Targeter [57]. Construction of guide RNA vectors and preparation of sgRNA and

414 Cas9 mRNA were performed as described in previous reports [58, 59]. The mutation  
415 efficiency was assessed by performing a T7 endonuclease assay [60] using the  
416 following primers: 5'-TTG ATT TAG GTC ATG TGT GTT ATA TG-3', 5'-TTT GTT  
417 TGT AGT CCC GTA TGT TTT T-3' for *pax1a* and 5'-GTT TTT CTG ACA ATG  
418 CAA AAA GTG-3', 5'-CGT ATT TCC CAA GCA AAT ATC C-3' for *pax1b*. Details  
419 of *pax1a* and *pax1b* mutagenesis and sequences of sgRNAs are described in the  
420 Supplementary information (Fig. S3). For microinjections, 1 nl of each injection  
421 solution (Tol2 transgenesis: 25 ng/μl plasmid, 50 ng/μl Tol2 mRNA, 0.2M KCl, and  
422 0.05% phenol red; CRISPR/Cas9: 25 ng/μl sgRNA, 100 ng/μl Cas9 mRNA, 0.2M KCl,  
423 and 0.05% phenol red) were injected into one-cell stage zebrafish embryos by using an  
424 IM300 micro injector (Narishige).

425

## 426 **Imaging**

427 Living embryos of *Tg(sox17:EGFP)*, whose chorions had been manually removed, were  
428 anesthetized with 0.02% ethyl-3-aminobenzoate methanesulfonate (MS-222) in 1/3  
429 zebrafish Ringer. For observations with a Leica SP8, the embryos were moved to  
430 mounting medium (0.15% low-melting-point agarose, 0.02% MS-222, 0.003% PTU in  
431 1/3 zebrafish Ringer) and individually set in the medium on a glass bottom dish.  
432 Positions of the embryos were manually turned by a tungsten needle with an eyelash on  
433 its tip. Z-stack images were taken at 10-minute intervals, and the stack images were  
434 processed with an LAS X (Leica) to make 3D images, optical sections, and movies. For  
435 imaging with a Zeiss Lightsheet Z.1, the anesthetized embryos were mounted as

436 previously described [61]. Images taken at 10-minute intervals were processed with  
437 ZEN Black (Zeiss) and subsequently with Imaris (Bitplane) to make movies.

438

#### 439 **Photoconversion and cell ablation**

440 Embryos of *Tg(sox17:Kaede)* for photoconversion or *Tg(sox17:EGFP)* for cell ablation  
441 were mounted as described above. Photoconversion was performed with a Leica SP8  
442 using a 405-nm diode laser. Regions of interest (ROI) in the Kaede-expressing  
443 endoderm at 20 hpf were converted by using the ROI tool in LAS X (Leica). Converted  
444 embryos were released from the gel and incubated at 28°C, and were observed again at  
445 48 hpf. Cell ablations with an IR-LEGO system were performed as previously described  
446 [38]. A high-power flash irradiation from an IR laser (80 mW for 8 ms) was performed  
447 a few times until the EGFP signals of target regions had been eliminated. Operated  
448 embryos were released from the gel and incubated at 28°C until subsequent experiments  
449 could be performed. For the control experiment for cell ablation, *Tg(sox17:EGFP)*  
450 embryos were injected with mRNA of histone H2A-mCherry at the one-cell stage to  
451 visualize cell nucleus in the live condition. At 20 hpf, embryos were scanned with a  
452 Nikon A1 before ablation and moved to the IR-LEGO. After infrared irradiation on the  
453 IR-LEGO, embryos were immediately moved to the Nikon A1 and scanned again to  
454 evaluate off-target damage to cells of adjacent PAs. This procedure was repeated, and  
455 the operated embryos were fixed in 4% PFA/PBST and stored in methanol at -20°C for  
456 *in situ* hybridization with a *dlx2a* probe and for immunohistochemistry with anti-GFP  
457 antibody to assess CNCCs in the PA.

458

459 **Staining**

460 Whole-mount *in situ* hybridization of zebrafish was performed as described previously  
461 [62]. For double-fluorescence *in situ* hybridization experiments, anti-DIG-POD (Roche)  
462 and anti-FITC-POD (Roche) were used to detect each hapten in RNA probes.  
463 Fluorescent signals were detected with a TSA Plus Cy3/fluorescein system  
464 (PerkinElmer). Plasmids for probes of *dlx2a*, *nkx2.3*, and *shha* [63] were kindly donated  
465 by Drs. M. Hibi, Y. Kikuchi and S. Krauss, respectively. Primers for cloning other  
466 probes of zebrafish genes were as follow: 5'-ATG CTT TCG TGT TTT GCA GAG  
467 CAA ACA TAC-3', 5'-TTA CGA GGA TGA GGT AGA AAG GCT GAG TCC-3' for  
468 *pax1a*; 5'-ATG CAA ATG GAT CAG ACG TAC GGG GAG GTG-3', 5'-TTA TGA  
469 GTC TGA GAG TCC ATG AAC AGC GCT-3' for *pax1b*; 5'-ATG ATT TCA GCA  
470 ATA TCA AGC CCG TGG CTG-3', 5'-TTA TCT GGG TCC GTA GTC ATA ATT  
471 AGT CGG-3' for *tbx1*; and 5'-AAA TCT CAC GAT AGG CTC CCT G-3', 5'-AAA  
472 GTA CTC CTG ATT GCA GT-3' for *fgf3*. Immunostaining was conducted as  
473 previously reported [64] by using primary antibodies anti-Alcam (1:500;  
474 Developmental Studies Hybridoma Bank, University of Iowa City), anti-Kaede (1:400;  
475 MBL, PM012), anti-GFP (1:400; Abcam, AB13970), followed by Alexa  
476 Fluor-conjugated secondary antibodies (Invitrogen). Bone and cartilage staining of  
477 zebrafish larvae was performed as previously described [65]. Whole-mount *in situ*  
478 hybridization of shark embryos was performed as per the zebrafish method. *S. torazame*  
479 *Pax1* was cloned by use of the following primers: 5'-ATG GAT CAG ACT TAC GGA



480 GAG GTT AAG G-3', 5'-TTA CGT ACT GGA GGC CGG GAT TG-3'. For nuclear  
481 staining of lamprey embryos, dechorionized embryos were fixed in 4% PFA/PBST and  
482 stored in methanol at  $-20^{\circ}\text{C}$  until used. Rehydrated embryos were treated with RNaseA,  
483 and subsequently stained overnight at room temperature with YOYO1-Iodide in PBST  
484 (1:2000; Thermo Fisher Scientific). The stained embryos were rinsed with PBST  
485 several times, dehydrated with methanol, and soaked in BABB (benzyl alcohol/ benzyl  
486 benzoate, 1:2 ratio) prior to confocal imaging.

487

#### 488 **DEAB treatment**

489 DEAB (N,N-diethylaminobenzaldehyde) stock, which was stored at  $-20^{\circ}\text{C}$ , was  
490 prepared at a 100 mM concentration in DMSO. DEAB treatment was conducted at final  
491 concentrations of  $10^{-4}\text{M}$  for both zebrafish (from 10 to 20 hpf) and lamprey (from st.16  
492 to st.24), as previously described [17, 66]. The embryos were cultured in a dark  
493 incubator, at  $28^{\circ}\text{C}$  for zebrafish and  $16^{\circ}\text{C}$  for lampreys. Because of long-term  
494 development of lamprey embryos, the DEAB solution bathing these embryos was  
495 replaced with fresh solution once per day. Control embryos were treated under the same  
496 conditions, but with 0.1% DMSO only.

497 **Acknowledgements**

498 We thank Dr. Y. Kikuchi for *Tg(sox17:EGFP)* zebrafish, a plasmid of the *sox17*  
499 promoter, and *nkx2.3* probe; Dr. S. Higashijima for technical support in CRISPR/Cas9  
500 introduction; Dr. S. Krauss for the *shha* probe; Mr. M. Masuda and staff at the Hekinan  
501 Seaside Aquarium for collecting *S. torazame* embryos; Drs. S. Kuraku and K. Onimaru  
502 for shark information; Ms. H. Utsumi for technical support; Mrs. K. Takashiro for  
503 zebrafish maintenance; the Spectrography and Bioimaging Facility, NIBB Core  
504 Research Facilities, for technical support; Mmes. S. Ukai and R. Nobata for assistant  
505 secretary support; and all members of the S.T. laboratory for helpful discussions. This  
506 work was supported by the program Grants-in-Aid of the Japan Society for Scientific  
507 Research on Innovative Areas to S.T. [no. 24111002] and by an NIBB Young  
508 Researcher Fellowship (2016) to K.O.

509

510 **Author contributions**

511 K.O. and S.T. conceived of and designed the research; K.O. performed all the  
512 experiments; K.O. confirmed and analyzed all the data; H.W. gathered the lamprey  
513 materials; K.O., S.T., and H.W. wrote and edited the manuscript.

514

515 **Competing financial interests**

516 The authors declare no competing or financial interests.

## 517 **References**

- 518 1. Hannibal, R.L. and Patel, N.H. (2013). What is a segment? *EvoDevo* 4, 10.
- 519 2. Carroll, S.B. (1995). Homeotic genes and the evolution of arthropods and  
520 chordates. *Nature* 376, 479–485.
- 521 3. Graham, A. (2001). The development and evolution of the pharyngeal arches. *J.*  
522 *Anat.*, 199, 133–141
- 523 4. Graham, A., and Richardson, J. (2012). Developmental and evolutionary origins  
524 of the pharyngeal apparatus. *EvoDevo* 3, 24.
- 525 5. Graham, A., and Smith, A. (2001). Patterning the pharyngeal arches. *BioEssays*  
526 23, 54–61.
- 527 6. Noden, D.M. (1983). The role of the neural crest in patterning of avian cranial  
528 skeletal, connective, and muscle tissues. *Dev. Biol.* 96, 144–165.
- 529 7. Schneider, R., and Helms, J. (2003). The cellular and molecular origins of beak  
530 morphology. *Science* 299, 565–568.
- 531 8. Lumsden, A., Sprawson, N., and Graham, A. (1991). Segmental origin and  
532 migration of neural crest cells in the hindbrain region of the chick embryo.  
533 *Development* 113, 1281–1291.
- 534 9. Graham, A., Begbie, J., and McGonnell, I. (2004). Significance of the cranial  
535 neural crest. *Dev. Dyn.* 229, 5–13.
- 536 10. Schilling, T.F., and Kimmel, C.B. (1994). Segment and cell type lineage  
537 restrictions during pharyngeal arch development in the zebrafish embryo.  
538 *Development* 120, 483–494.
- 539 11. Serbedzija, G.N., Bronner-Fraser, M., and Fraser, S.E. (1992). Vital dye analysis  
540 of cranial neural crest cell migration in the mouse embryo. *Development* 116,  
541 297–307.
- 542 12. Hunt, P., Gulisano, M., Cook, M., Sham, M.H., Faiella, A., Wilkinson, D.,  
543 Boncinelli, E., and Krumlauf, R. (1991). A distinct Hox code for the branchial  
544 region of the vertebrate head. *Nature* 353, 861–864.
- 545 13. Veitch, E., Begbie, J., Schilling, T.F., Smith, M.M., and Graham, A. (1999).  
546 Pharyngeal arch patterning in the absence of neural crest. *Curr. Biol.* 9, 1481–  
547 1484.
- 548 14. Gavalas, A., Trainor, P., Ariza-McNaughton, L., and Krumlauf, R. (2001).

- 549 Synergy between Hoxa1 and Hoxb1: the relationship between arch patterning  
550 and the generation of cranial neural crest. *Development* 128, 3017–3027.
- 551 15. Graham, A., Butts, T., Lumsden, A., and Kiecker, C. (2014). What can  
552 vertebrates tell us about segmentation. *EvoDevo* 5, 24.
- 553 16. Crump, J.G., Maves, L., Lawson, N.D., Weinstein, B.M., and Kimmel, C.B.  
554 (2004). An essential role for Fgfs in endodermal pouch formation influences  
555 later craniofacial skeletal patterning. *Development* 131, 5703–5716.
- 556 17. Kopinke, D., Sasine, J., Swift, J., Stephens, W.Z., and Piotrowski, T. (2006).  
557 Retinoic acid is required for endodermal pouch morphogenesis and not for  
558 pharyngeal endoderm specification. *Dev. Dyn.* 235, 2695–2709.
- 559 18. Quinlan, R., Gale, E., Maden, M., and Graham, A. (2002). Deficits in the  
560 posterior pharyngeal endoderm in the absence of retinoids. *Dev. Dyn.* 225, 54–  
561 60.
- 562 19. White, J.C., Shankar, V.N., Highland, M., Epstein, M.L., DeLuca, H.F., and  
563 Clagett-Dame, M. (1998). Defects in embryonic hindbrain development and  
564 fetal resorption resulting from vitamin A deficiency in the rat are prevented by  
565 feeding pharmacological levels of all-trans-retinoic acid. *Proc. Natl. Acad. Sci.*  
566 95, 13459–13464.
- 567 20. Wendling, O., Dennefeld, C., Chambon, P., and Mark, M. (2000). Retinoid  
568 signaling is essential for patterning the endoderm of the third and fourth  
569 pharyngeal arches. *Development* 127, 1553–1562.
- 570 21. Okada, K., Inohaya, K., Mise, T., Kudo, A., Takada, S., and Wada, H. (2016).  
571 Reiterative expression of pax1 directs pharyngeal pouch segmentation in  
572 medaka. *Development* 143, 1800–1810.
- 573 22. Okubo, T., Kawamura, A., Takahashi, J., Yagi, H., Morishima, M., Matsuoka,  
574 R., and Takada, S. (2011). Ripply3, a Tbx1 repressor, is required for  
575 development of the pharyngeal apparatus and its derivatives in mice.  
576 *Development* 138, 339–348.
- 577 23. Ogasawara, M., Wada, H., Peters, H., and Satoh, N. (1999). Developmental  
578 expression of Pax1/9 genes in urochordate and hemichordate gills: insight into  
579 function and evolution of the pharyngeal epithelium. *Development* 126,  
580 2539–2550.
- 581 24. Gillis, J.A., Fritzenwanker, J.H., and Lowe, C.J. (2012). A stem-deuterostome

- 582 origin of the vertebrate pharyngeal transcriptional network. *Proc. R. Soc. B* 279,  
583 237–246.
- 584 25. Holland, N., Holland, L., and Kozmik, Z. (1995). An amphioxus Pax gene,  
585 *AmphiPax-1*, expressed in embryonic endoderm, but not in mesoderm:  
586 implications for the evolution of class I paired box genes. *Mol. Mar. Biol.*  
587 *Biotechnol.* 4, 206–214.
- 588 26. Simakov, O., Kawashima, T., Marletaz, F., Jenkins, J., Koyanagi, R., Mitros, T.,  
589 Hisata, K., Bredeson, J., Shoguchi, E., Gyoja, F., et al. (2015). Hemichordate  
590 genomes and deuterostome origins. *Nature* 527, 459–465.
- 591 27. Bertrand, S., and Escriva, H. (2011). Evolutionary crossroads in developmental  
592 biology: amphioxus. *Development* 138, 4819–4830.
- 593 28. David, N.B., Saint-Etienne, L., Tsang, M., Schilling, T.F., and Rosa, F.M.  
594 (2002). Requirement for endoderm and FGF3 in ventral head skeleton formation.  
595 *Development* 129, 4457–4468.
- 596 29. Crump, J.G., Swartz, M.E., and Kimmel, C.B. (2004). An integrin-dependent  
597 role of pouch endoderm in hyoid cartilage development. *PLoS Biol.* 2, E244.
- 598 30. Couly, G., Creuzet, S., Bennaceur, S., Vincent, C., and Le Douarin, N.M. (2002).  
599 Interactions between Hox-negative cephalic neural crest cells and the foregut  
600 endoderm in patterning the facial skeleton in the vertebrate head. *Development*  
601 129, 1061–1073.
- 602 31. Choe, C.P., Collazo, A., Trinh le, A., Pan, L., Moens, C.B., and Crump, J.G.  
603 (2013). Wnt-dependent epithelial transitions drive pharyngeal pouch formation.  
604 *Dev. Cell* 24, 296–309.
- 605 32. Choe, C.P., and Crump, J.G. (2014). *Tbx1* controls the morphogenesis of  
606 pharyngeal pouch epithelia through mesodermal *Wnt11r* and *Fgf8a*.  
607 *Development* 141, 3583–3593.
- 608 33. Choe, C.P., and Crump, J.G. (2015). Eph-Pak2a signaling regulates branching of  
609 the pharyngeal endoderm by inhibiting late-stage epithelial dynamics.  
610 *Development* 142, 1089–1094.
- 611 34. Choe, C.P., and Crump, J.G. (2015). Dynamic epithelia of the developing  
612 vertebrate face. *Curr. Opin. Genet. Dev.* 32C, 66–72.
- 613 35. Mizoguchi, T., Verkade, H., Heath, J.K., Kuroiwa, A., and Kikuchi, Y. (2008).  
614 *Sdf1/Cxcr4* signaling controls the dorsal migration of endodermal cells during

- 615 zebrafish gastrulation. *Development* 135, 2521–2529.
- 616 36. Lee, K.H., Xu, Q., and Breitbart, R.E. (1996). A new tinman-related gene,  
617 nkx2.7, anticipates the expression of nkx2.5 and nkx2.3 in zebrafish heart and  
618 pharyngeal endoderm. *Dev. Biol.* 180, 722–731.
- 619 37. Kamei, Y., Suzuki, M., Watanabe, K., Fujimori, K., Kawasaki, T., Deguchi, T.,  
620 Yoneda, Y., Todo, T., Takagi, S., Funatsu, T., et al. (2009). Infrared  
621 laser-mediated gene induction in targeted single cells in vivo. *Nat. Methods* 6,  
622 79–81.
- 623 38. Zeng, C.W., Kamei, Y., Wang, C.T., and Tsai, H.J. (2016). Subtypes of  
624 hypoxia-responsive cells differentiate into neurons in spinal cord of zebrafish  
625 embryos after hypoxic stress. *Biol. Cell* 108, 357–377.
- 626 39. Richardson, J., Shono, T., Okabe, M., and Graham, A. (2012). The presence of  
627 an embryonic opercular flap in amniotes. *Proc. R. Soc. B* 279, 224–229.
- 628 40. Retnoaji, B., Akiyama, R., Matta, T., Bessho, Y., and Matsui, T. (2014).  
629 Retinoic acid controls proper head-to-trunk linkage in zebrafish by regulating an  
630 anteroposterior somitogenetic rate difference. *Development* 141, 158–165.
- 631 41. Brazeau, M.D., and Friedman, M. (2015). The origin and early phylogenetic  
632 history of jawed vertebrates. *Nature* 520, 490–497.
- 633 42. Davis, G.K., and Patel, N.H. (2002). Short, long, and beyond: molecular and  
634 embryological approaches to insect segmentation. *Annu. Rev. Entomol.* 47,  
635 669–699.
- 636 43. Pourquie, O. (2011). Vertebrate segmentation: from cyclic gene networks to  
637 scoliosis. *Cell* 145, 650–663.
- 638 44. Jerome, L.A., and Papaioannou, V.E. (2001). DiGeorge syndrome phenotype in  
639 mice mutant for the T-box gene, *Tbx1*. *Nat. Genet.* 27, 286–291.
- 640 45. Zhu, M., Yu, X., Ahlberg, P.E., Choo, B., Lu, J., Qiao, T., Qu, Q., Zhao, W., Jia,  
641 L., Blom, H., et al. (2013). A Silurian placoderm with osteichthyan-like  
642 marginal jaw bones. *Nature* 502, 188–193.
- 643 46. Brazeau, M.D., and de Winter, V. (2015). The hyoid arch and braincase anatomy  
644 of *Acanthodes* support chondrichthyan affinity of 'acanthodians'. *Proc. R. Soc. B*  
645 282, 20152210.
- 646 47. Janvier, P. (1996). *Early Vertebrates*, (Clarendon Press).
- 647 48. Talbot, J.C., Walker, M.B., Carney, T.J., Huycke, T.R., Yan, Y.L., BreMiller,

- 648 R.A., Gai, L., Delaurier, A., Postlethwait, J.H., Hammerschmidt, M., et al.  
649 (2012). *fras1* shapes endodermal pouch 1 and stabilizes zebrafish pharyngeal  
650 skeletal development. *Development* 139, 2804–2813.
- 651 49. Xu, H., Cerrato, F., and Baldini, A. (2005). Timed mutation and cell-fate  
652 mapping reveal reiterated roles of *Tbx1* during embryogenesis, and a crucial  
653 function during segmentation of the pharyngeal system via regulation of  
654 endoderm expansion. *Development* 132, 4387–4395.
- 655 50. Liu, X., Li, G., Liu, X., and Wang, Y.Q. (2015). The role of the *Pax1/9* gene in  
656 the early development of amphioxus pharyngeal gill slits. *J. Exp. Zool. B Mol.*  
657 *Dev. Evol.* 324, 30-40.
- 658 51. Kishimoto, Y., Koshida, S., Furutani-Seiki, M., and Kondoh, H. (2004).  
659 Zebrafish maternal-effect mutations causing cytokinesis defect without affecting  
660 mitosis or equatorial vasa deposition. *Mech. Dev.* 121, 79–89.
- 661 52. Ballard, W.W., Mellinger, J., and Lechenault, H. (1993). A series of normal  
662 stages for development of *Scyliorhinus canicula*, the lesser spotted dogfish  
663 (Chondrichthyes: Scyliorhinidae). *J. Exp. Zool.* 267, 318–336.
- 664 53. Yao, T., Ohtani, K., Kuratani, S., and Wada, H. (2011). Development of  
665 lamprey mucocartilage and its dorsal-ventral patterning by endothelin signaling,  
666 with insight into vertebrate jaw evolution. *J. Exp. Zool. B Mol. Dev. Evol.* 316,  
667 339–346.
- 668 54. Tahara, Y. (1988). Normal stages of development in the lamprey, *Lampetra*  
669 *reissneri* (Dybowski). *Zool. Sci.* 5, 109–118.
- 670 55. Yabe, T., and Takada, S. (2012). Mesogenin causes embryonic mesoderm  
671 progenitors to differentiate during development of zebrafish tail somites. *Dev.*  
672 *Biol.* 370, 213–222.
- 673 56. Kawakami, K., Takeda, H., Kawakami, N., Kobayashi, M., Matsuda, N., and  
674 Mishina, M. (2004). A transposon-mediated gene trap approach identifies  
675 developmentally regulated genes in zebrafish. *Dev. Cell* 7, 133–144.
- 676 57. Sander, J.D., Maeder, M.L., Reyon, D., Voytas, D.F., Joung, J.K., and Dobbs, D.  
677 (2010). ZiFiT (Zinc Finger Targeter): an updated zinc finger engineering tool.  
678 *Nucleic Acids Res.* 38, W462–W468.
- 679 58. Cong, L., Ran, F.A., Cox, D., Lin, S., Barretto, R., Habib, N., Hsu, P.D., Wu, X.,  
680 Jiang, W., and Marraffini, L.A. (2013). Multiplex genome engineering using

- 681 CRISPR/Cas systems. *Science* 339, 819–823.
- 682 59. Hwang, W.Y., Fu, Y., Reyon, D., Maeder, M.L., Tsai, S.Q., Sander, J.D.,  
683 Peterson, R.T., Yeh, J.R., and Joung, J.K. (2013). Efficient genome editing in  
684 zebrafish using a CRISPR-Cas system. *Nat. Biotechnol.* 31, 227–229.
- 685 60. Chen, J., Zhang, X., Wang, T., Li, Z., Guan, G., and Hong, Y. (2012). Efficient  
686 detection, quantification and enrichment of subtle allelic alterations. *DNA Res.*  
687 19, 423–433.
- 688 61. Weber, M., Mickoleit, M., and Huisken, J. (2014). Multilayer mounting for  
689 long-term light sheet microscopy of zebrafish. *J. Vis. Exp.*, e51119.
- 690 62. Jowett, T. (2001). Double in situ hybridization techniques in zebrafish. *Methods*  
691 23, 345–358.
- 692 63. Krauss, S., Concordet, J.-P., and Ingham, P. (1993). A functionally conserved  
693 homolog of the *Drosophila* segment polarity gene *hh* is expressed in tissues with  
694 polarizing activity in zebrafish embryos. *Cell* 75, 1431–1444.
- 695 64. Yabe, T., Hoshijima, K., Yamamoto, T., and Takada, S. (2016). *Mesp* quadruple  
696 zebrafish mutant reveals different roles of *mesp* genes in somite segmentation  
697 between mouse and zebrafish. *Development* 143, 2842–2852
- 698 65. Walker, M., and Kimmel, C. (2007). A two-color acid-free cartilage and bone  
699 stain for zebrafish larvae. *Biotech. Histochem.* 82, 23–28.
- 700 66. Jandzik, D., Hawkins, M.B., Cattell, M.V., Cerny, R., Square, T.A., and  
701 Medeiros, D.M. (2014). Roles for FGF in lamprey pharyngeal pouch formation  
702 and skeletogenesis highlight ancestral functions in the vertebrate head.  
703 *Development* 141, 629–638.
- 704
- 705



706 **Figures**

707 Figure 1. Time-lapse observations of the pharyngeal endoderm during PP  
708 segmentation in *Tg(sox17:EGFP)* zebrafish embryos

709 (A–J), Time-lapse analysis of the pharyngeal endoderm of *Tg(sox17:EGFP)* zebrafish  
710 from 12 to 22 hpf (A–F, Movie S1) and from 26 to 38 hpf (G–J, Movie S2). Rostral  
711 (arrow) and caudal (arrowhead) bulges appeared posterior to PP1 and gradually fused to  
712 form a PP2.

713 (K–N), Schematic illustrations of the shape of the lateral pharyngeal endoderm in G–J,  
714 respectively.

715 A, anterior; P, posterior; D, dorsal; V, ventral; PP1–6, the first to sixth pharyngeal  
716 pouches; arrows, rostral bulges; arrowheads, caudal bulges. Scale bars, 50  $\mu\text{m}$  (A) and  
717 20  $\mu\text{m}$  (G).

718

719 Figure 2. Lineage tracing of endodermal cells in *Tg(sox17:Kaede)* zebrafish  
720 embryos by photoconversion

721 (A–E) The cells of the rostral bulge (arrows) were marked at 20 hpf (A and B). At 48  
722 hpf, cells of the rostral bulge contributed to the large area of the rostral aspect of PP2  
723 (C–E).

724 (F–J) The cells of the caudal bulge (arrowheads) were marked at 20 hpf (F and G). At  
725 48 hpf, the descendant cells contributed to the caudal aspect of PP2 rather proximally  
726 (H–J).

727 (K–N) The cells of the intermediate domain of a putative PP2 (between the rostral and

728 caudal bulges) were marked (K and L). At 48 hpf, these descendants composed the  
729 dorsally and ventrally distant area in the caudal aspect of PP2 (M and N).

730 (O) Overview of the cell fate in the future PP2 endoderm at 20 hpf. Cell fates were  
731 examined in various regions of the presumptive PP2 endoderm by photoconversion (n =  
732 26, A–N and Figure S1); and these are summarized, showing the dynamic  
733 reorganization of the endoderm forming PP2.

734 A, anterior; P, posterior; D, dorsal; V, ventral; M, medial; L, lateral; BA, branchial arch;  
735 HA, hyoid arch; PP1–6, the first to sixth pharyngeal pouches; arrows, rostral bulge;  
736 arrowheads, caudal bulge; asterisk, blood vessel. Scale bar, 50  $\mu$ m.

737

738 Figure 3. Separated formations and the rostrocaudal identity in the PP2  
739 endoderm at 20 hpf

740 (A–D) Expressions of *nkx2.3* separately indicated the rostral (arrows) and caudal  
741 (arrowheads) bulges of the PP2 endoderm indicated by immunohistochemistry with  
742 Kaede antibody.

743 (E–H) Expression of *pax1* was detected in PP1 and the caudal part of PP2 endoderm  
744 (arrowheads) but almost absent in the rostral bulge of the PP2 endoderm (arrows).

745 (I–N) Expressions of *tbx1* (I–L) and *fgf3* (I, J, M and N) were detected in the respective  
746 regions of rostral (arrows) and caudal (arrowheads) bulges of PP2 showing an early  
747 specification of rostrocaudal polarity of the PP2.

748 (O) According to the fate analysis and the molecular profiles, the rostral and the caudal  
749 bulges of the future PP2 are distinctly defined as R2 (red, arrow) and C2 (green,

750 arrowhead), respectively. Whereas cells of the intermediate region (gray) contribute to  
751 the caudal aspect, *fgf3*, which is a caudal marker, is not expressed in these cells at 20  
752 hpf.

753 A, anterior; P, posterior; D, dorsal; V, ventral; PP1, the first pharyngeal pouch; arrows,  
754 rostral bulge; arrowheads, caudal bulge. Scale bar, 20  $\mu$ m.

755

756 Figure 4. Early determinations of distinct roles for later skeletal patterns in R2  
757 and C2 endoderm

758 (A and A') Cells of R2 (arrows) in *Tg(sox17:EGFP)* embryos were ablated at 20 hpf.

759 (B–E) R2 ablations caused a specific loss of the epithelial expansion of the caudal lining  
760 of HA (asterisks in C) and reductions in HA-derived skeletons, especially in the  
761 opercular series (OP, BR) (D–F).

762 (G and H) Expression of *shha*, required for opercular development, was detected in the  
763 PP2 endoderm occupied by the R2 descendants (G and H).

764 (I) Consistent with the endodermal (B and C) and the skeletal (D–F) phenotypes, R2  
765 ablation caused a specific loss of the *shha* expression in PP2, as shown in a  
766 flat-mounted embryo (asterisk in I).

767 (J and J') Cells of C2 (arrowheads) in *Tg(sox17:EGFP)* embryos were ablated at 20 hpf.

768 (K–M) Ablations of C2 cells caused a loss of the proximal region of PP2, which  
769 consists of the rostral lining of the third PA (BA1) (K and L, asterisk in L), resulting in a  
770 loss of CB1 cartilage (M).

771 (N and N') Endodermal cells between R2 (arrows) and C2 (arrowheads) were ablated in

772 *Tg(sox17:EGFP)* embryos at 20hpf.

773 (O–Q) Ablations of cells in the intermediate region did not affect the segregations of  
774 HA and BA1 but caused abnormal arrangements of them, shown by a split between HA  
775 and BA1 (O and P). Correspondingly, in the ablated sides, the positions of the  
776 BA1-derived CB1 cartilage shifted posteriorly; although a complete set of the  
777 pharyngeal skeletons developed (Q).

778 Images of ablation sides (C, F, L and Q) were inverted in a left-right direction for  
779 comparisons with contralateral sides. A, anterior; P, posterior; D, dorsal; V, ventral; L,  
780 lateral; M, medial; BR, branchiostegal ray; CB1–5, the first to fifth ceratobranchials;  
781 CH, ceratohyal; HA, hyoid arch; HM, hyomandibular; MC, Meckel’s cartilage; OP,  
782 opercular bone; PP1–6, the first to sixth pharyngeal pouches; PQ, palatoquadrate; SY,  
783 symplectic; arrows, R2; arrowheads, C2. Scale bars, 20  $\mu\text{m}$  (A), 50  $\mu\text{m}$  (B, H and I) and  
784 100  $\mu\text{m}$  (D).

785

786 Figure 5. Boundaries of molecular mechanisms forming PPs between the rostral  
787 and caudal aspects of PP2

788 (A–F) Immunohistochemistry of double transgenic embryos of *Tg(sox17:Kaede)* and  
789 *Tg(RARE:Venus)* showed the specific signals of RA reporter Venus in the caudal aspect  
790 of PP2 and in the posterior PPs but not in the rostral aspect of PP2 and PP1 endoderm at  
791 20 hpf (A and B), 25 hpf (C and D) and 30 hpf (E and F).

792 (G–J) Expression of *tbx1* in R2 (arrows) was not affected.

793 (K–N) RA deficiency caused by DEAB treatment resulted in a loss of *fgf3* expression in

794 C2 (arrowheads).  
795 (O–R) Endodermal morphologies of wild-type (O and Q) and *pax1a*; *pax1b*-double  
796 knockout (*pax1* DKO) embryos (P and R) harboring a *Tg(sox17:EGFP)* transgene. At  
797 25 hpf, PP1, R2, C2, and PP3 were formed in the wild type (O); but in the *pax1* DKO  
798 embryos, C2 and PP3 were specifically defective (P, asterisk). At 48 hpf, complete  
799 segments of PP were observed in the wild type (Q); whereas the caudal PP2 and more  
800 posterior PPs were not formed in *pax1* DKO embryos (R, bracket and asterisk). Notably,  
801 PP1 and the rostral aspect of PP2 were almost normal in the mutants (R).  
802 All pictures show the left side view of the pharyngeal region. PP1–6, the first to sixth  
803 pharyngeal pouches; arrows, R2; arrowheads, C2. Scale bars, 50  $\mu$ m.

804

805 Figure 6. Expression analysis of Alcam in the PP endoderm of *Tg(sox17:Kaede)*  
806 (A–D) At 20 hpf, strong expression of Alcam was evident in C2 but hardly detected in  
807 PP1 and R2 endoderm.  
808 (E–H) At 25 hpf, Alcam was high in PP3 and the caudal aspect of PP2 but almost  
809 absent in PP1 and the rostral part of PP2.  
810 (I–L) At 30 hpf, high accumulation of Alcam was detected in PP3, PP4 and the caudal  
811 aspect of PP2 whereas it was very low level in PP1 and the rostral aspect of PP2.  
812 (M–P) At 35 hpf, high accumulation of Alcam was detected in PP3, PP4, PP5 and the  
813 caudal aspect of PP2 whereas it was very low level in PP1 and the rostral aspect of PP2.  
814 A, anterior; P, posterior; D, dorsal; V, ventral; L, lateral; M, medial; PP1–5, the first to  
815 fifth pharyngeal pouches; arrows, R2; arrowheads, C2. Scale bar, 50  $\mu$ m.

816

817 Figure 7. PP development in lamprey and shark embryos and the styles of the  
818 vertebrate PP segmentation

819 (A–E) PP development in the Japanese lamprey (*Lethenteron camtschaticum*) at stages  
820 (st.) 20–24. Only PP1 was formed at st. 21 (B), and PP2 appeared at st. 22 (C).  
821 Subsequently, PP3 was formed at st. 23–24 (D and E), showing that lamprey PPs,  
822 including PP2, were sequentially formed in an anterior to posterior order.

823 (F–I) PP morphologies in control and DEAB-treated lamprey embryos at st. 24. In  
824 control embryos, PP1–3 were formed (F and G), whereas PP2 and PP3 were not formed  
825 in the DEAB-treated embryos (H and I). Arrowheads indicate the PP positions in optical  
826 horizontal sections (G and I).

827 (J–P) PP development in the cloudy catshark (*S. torazame*) at st. 15–20. *In situ* signals  
828 from *pax1* probes visualized the lateral pharyngeal endoderm at st. 15, before PP  
829 segmentation was initiated (J). At st. 16, the endodermal epithelium formed 2  
830 outpocketings per side (K). These pockets continued on to develop PP1 and PP2 (L and  
831 M), suggesting that the PP1 and PP2 formations occur simultaneously in shark  
832 development, as also seen in osteichthyans. After development of PP1 and PP2, PP3  
833 and PP4 were sequentially formed at subsequent stages (N–P).

834 (Q and R) Schematic summaries of the styles of PP development in the vertebrates. In  
835 zebrafish, PP1 (purple), R2 (red) and C2 (green) endoderm initially develop to  
836 segregate the regions of MA, HA and BAs, respectively. The dynamic process of the  
837 PP2 development subsequently integrates the anterior and posterior PAs to accomplish

838 a theme-less series of PAs. In the shark, PP1 and PP2 (orange) are simultaneously  
839 generated to segregate the anterior PAs; whereas the posterior PPs (yellow) are  
840 sequentially formed. In the lamprey, however, all PPs (gray) are sequentially formed in  
841 an anterior to posterior order. The combinatorial styles of PP segmentation may be a  
842 conserved feature of gnathostomes (R).

843 A, anterior; P, posterior; D, dorsal; V, ventral; BA1–7, the first to seventh branchial  
844 arches; HA, hyoid arch; MA, mandibular arch; PP1–8, the first to eighth pharyngeal  
845 pouches. Scale bars, 100  $\mu\text{m}$  (A and F), 200  $\mu\text{m}$  (J and N).

846

847 **Figure 8. Evolution of PP development and pharyngeal systems in vertebrates**

848 The development of PP2 was modified, and R2 region was acquired in the common  
849 ancestor of gnathostomes, resulting in the developmental separation of the anterior PAs  
850 from posterior PAs. This modification might significantly contribute to the evolution of  
851 the hyoidean operculum in gnathostome lineage, leading to the extant osteichthyans.

Figure 1

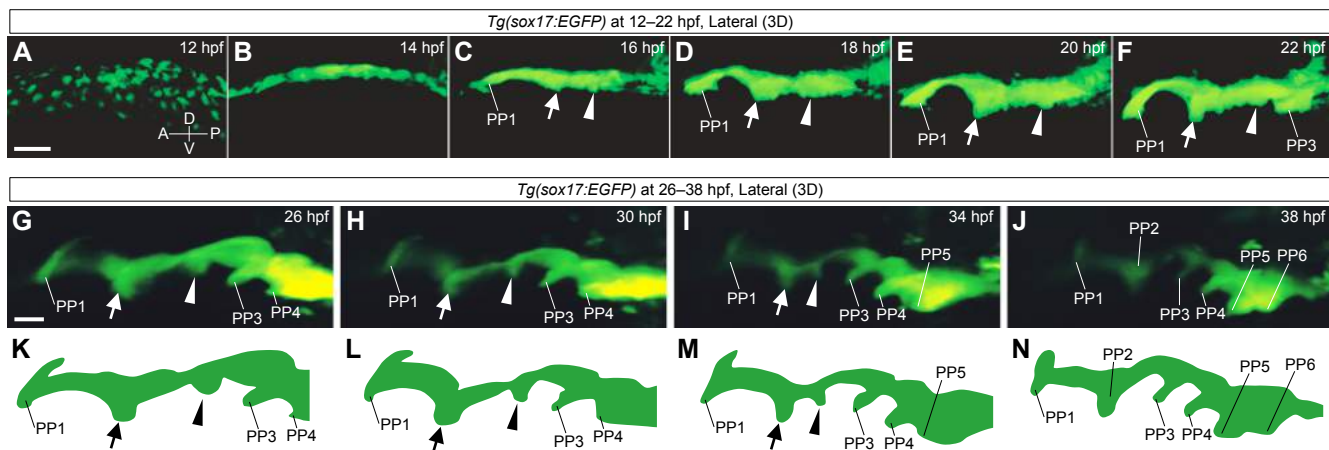

Figure 2

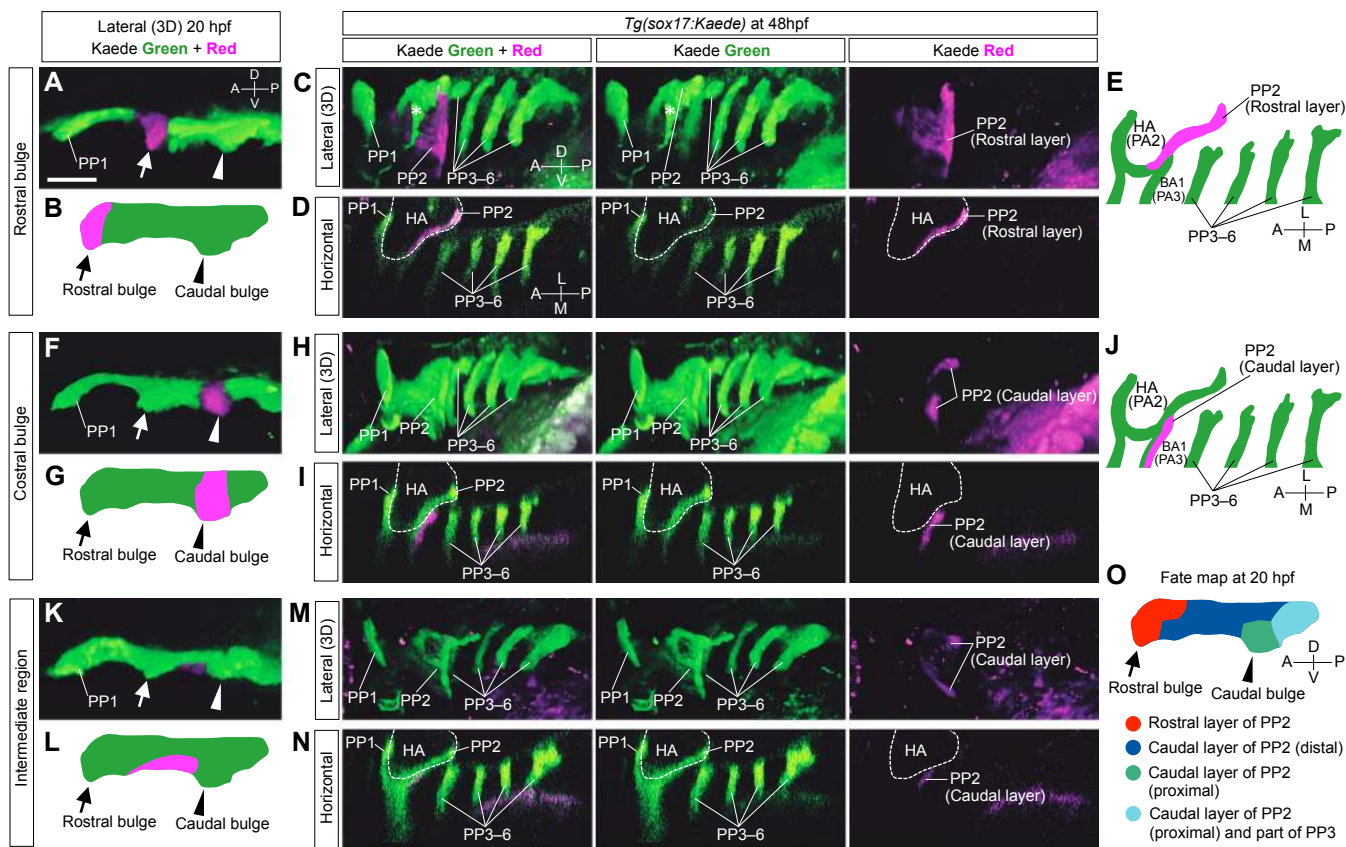



Figure 3

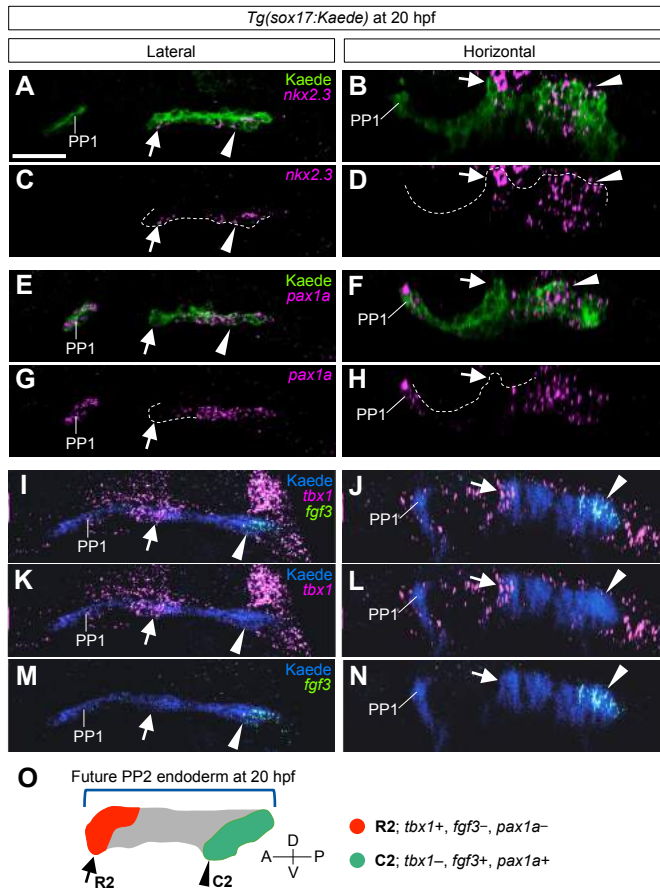

Figure 4

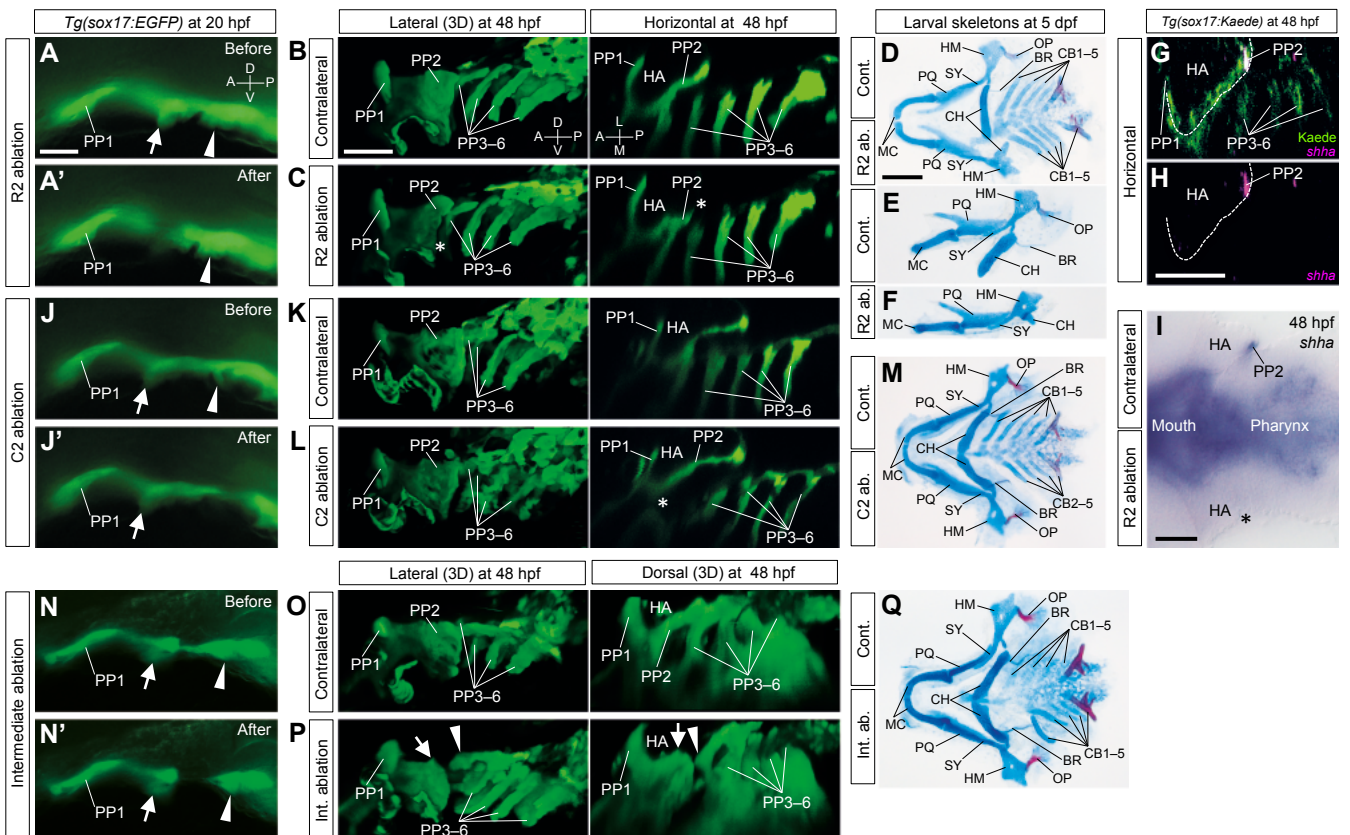

Figure 5

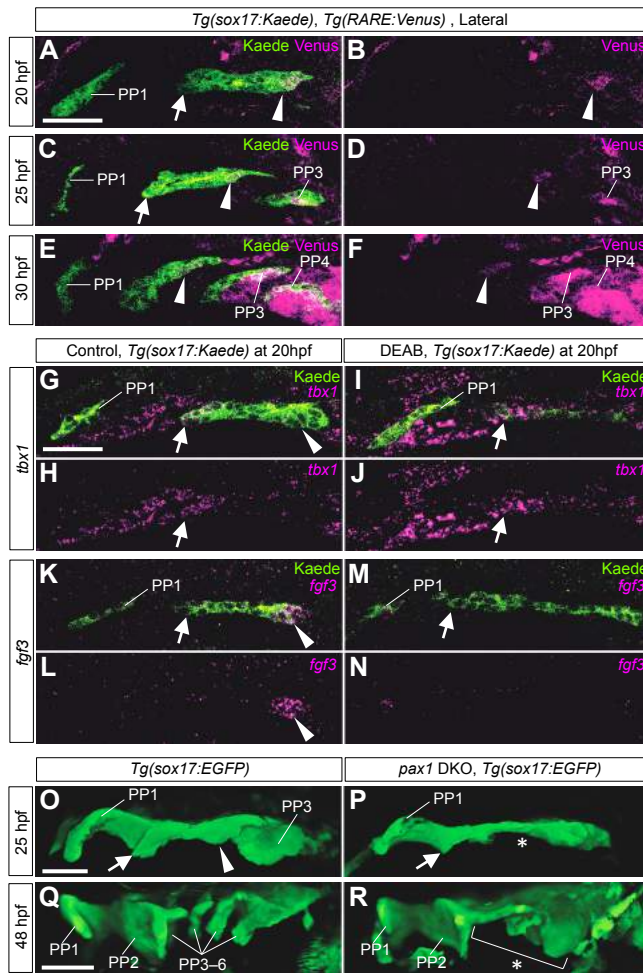

Figure 6

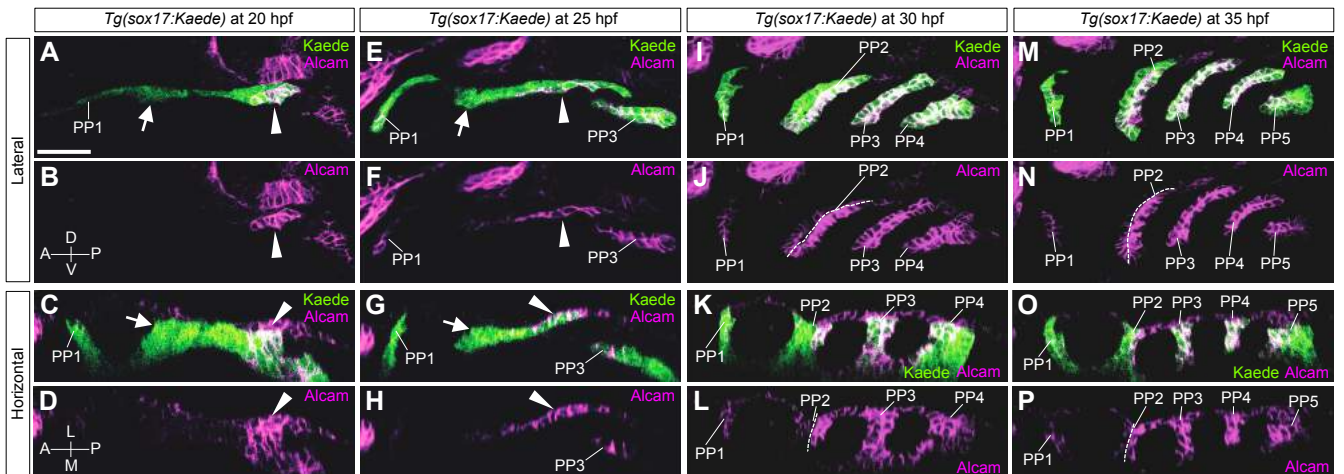

Figure 7

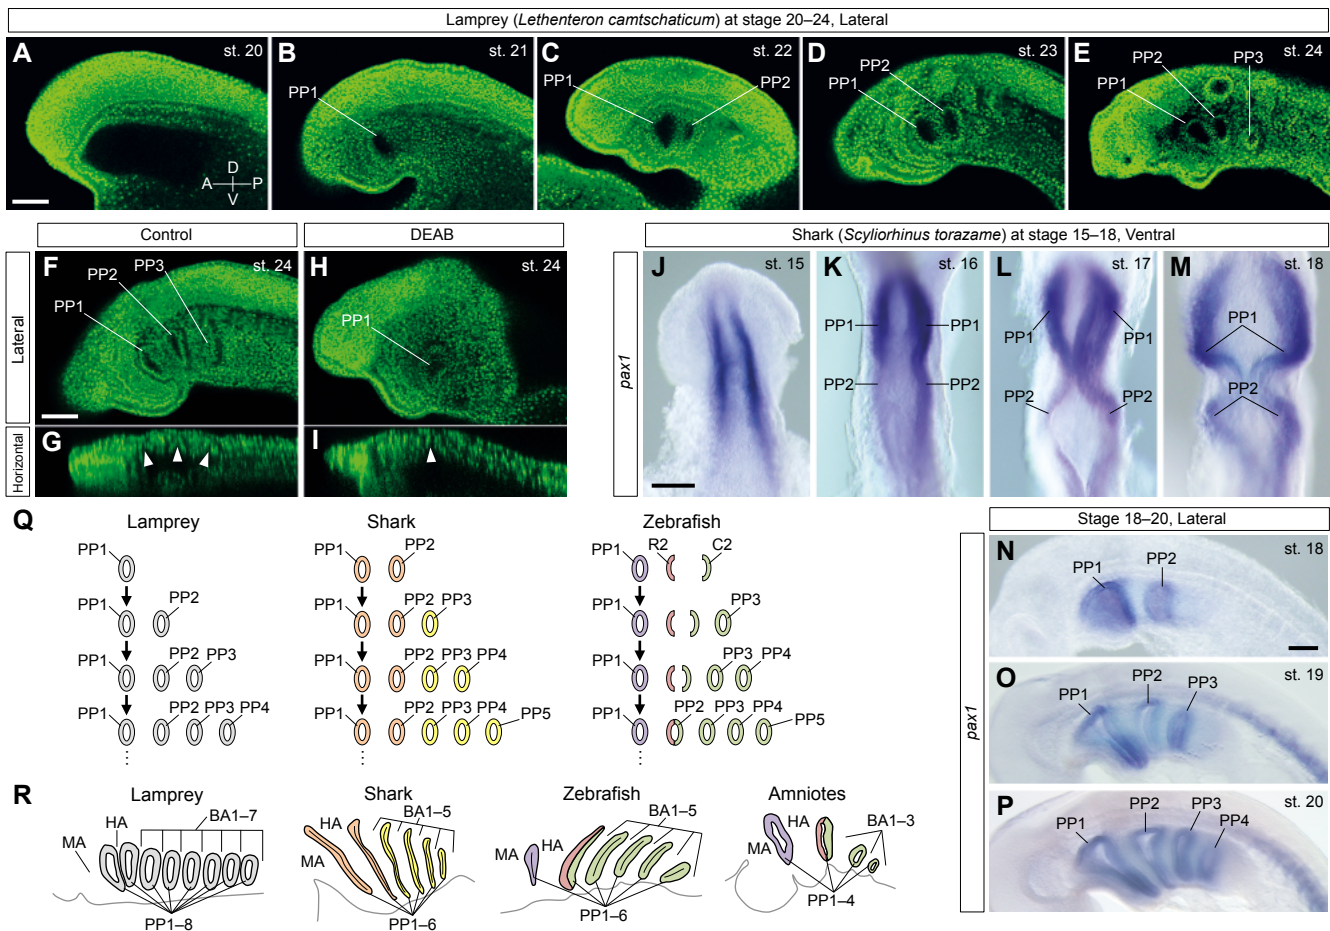

Figure 8

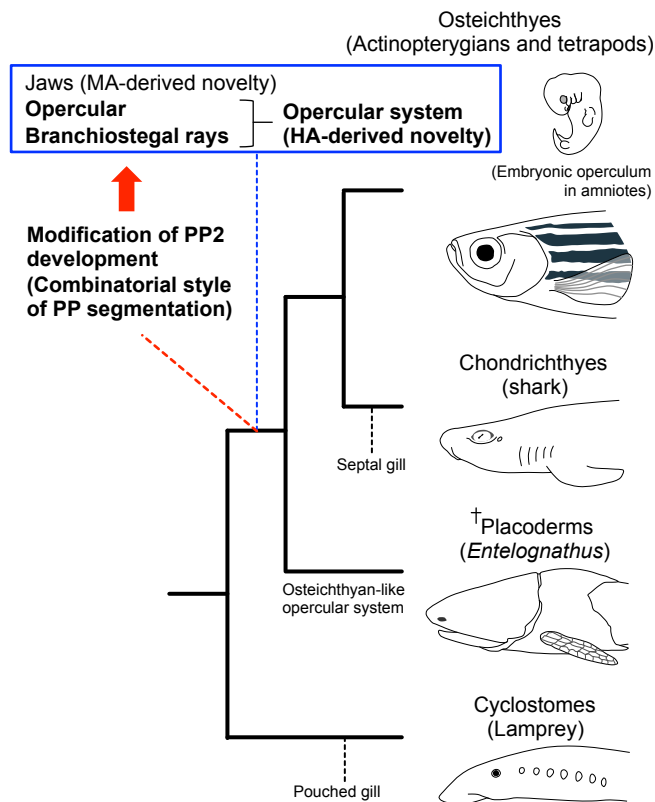

Source: https://www.biorxiv.org/content/10.1101/260356v1.full.pdf
